# Supplementary material
Source: PubMed Central journal article supplement (PMC8278226)

**eFigure 1 Cohort 1 Overall Survival by Contributing Site**

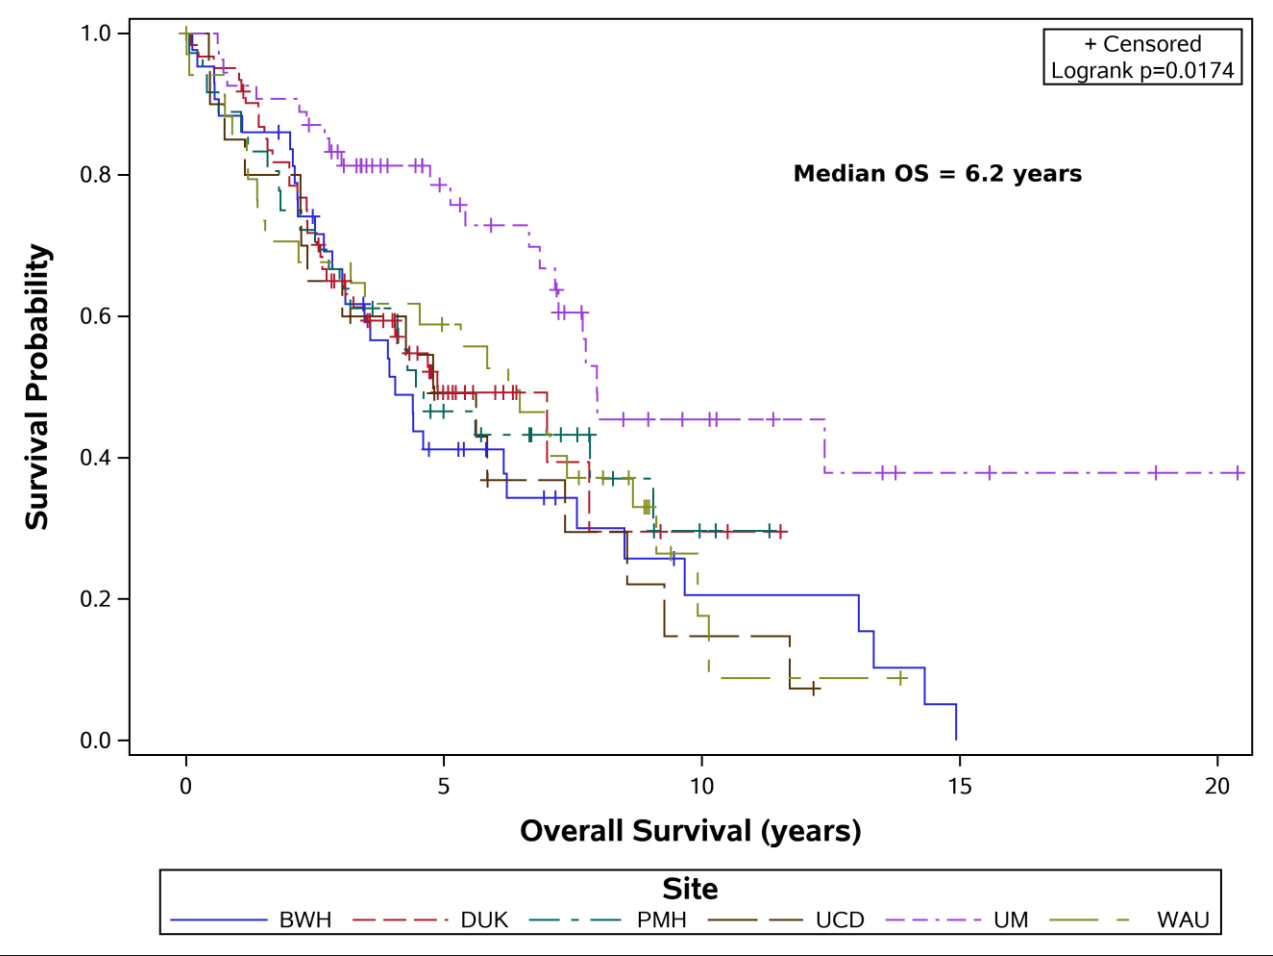

Supplement: NIHMS1716180-supplement-1.pdf [file NIHMS1716180-supplement-1.pdf]
